# Supplementary material
Source: publisher figshare collection journal article supplement (https://acs.figshare.com/ndownloader/files/23173409)
Supplement: Supplementary file 1 [file 23173409]

# Supporting information

## Structural and Morphological Transformation of Two-dimension MOF Accompanied by Controlled Preparation Using Spray Method

Sha Wang, Junchao Ma, Xu Zhai, Xuemin Zhang, Fuqiang Fan, Tieqiang Wang, Yunong Li,  
Liyong Zhang and Yu Fu\*

Department of Chemistry, College of Sciences, Northeastern University, Shenyang 110819, P. R.  
China. \*E-mail: fuyu@mail.neu.edu.cn (Y. Fu).

### Contents

|                                  |    |
|----------------------------------|----|
| Figure S1. SEM image.....        | S1 |
| Figure S2. XRD patterns.....     | S2 |
| Figure S3. Reaction pathway..... | S2 |

### SEM image

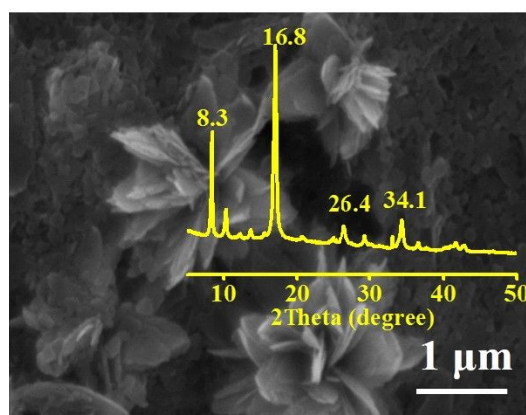

**Figure S1** SEM image of the coexistence of the non-interpenetrate CuBDC twists and Cu(BDC)(DMF) nanosheets. The inset shows XRD patterns of the coexistence of the non-interpenetrate CuBDC twists and Cu(BDC)(DMF) nanosheets.

### XRD patterns

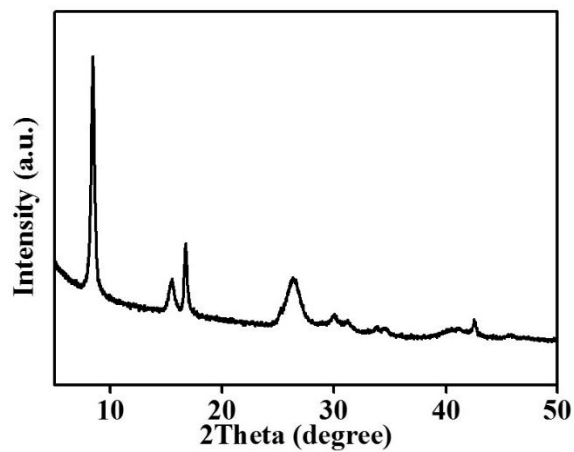

**Figure S2** XRD patterns of the non-interpenetrate CuBDC prepared when acidity buffer reagents were added into H<sub>2</sub>BDC.

### Reaction pathway

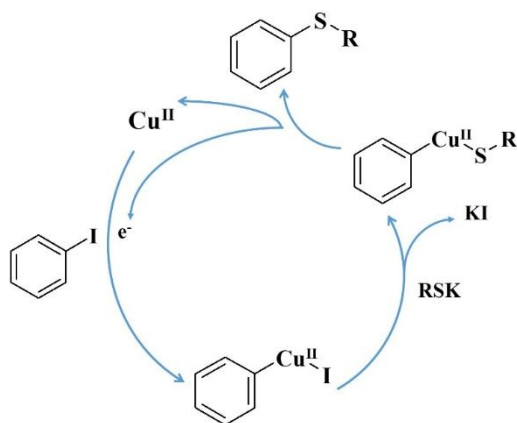

**Figure S3** Proposed reaction pathway for the Cu-based MOF-catalyzed C-S cross-coupling of iodobenzene with dodecyl mercaptan in the presence of KOH, R=dodecyl.
